# Supplementary material
Source: MDPI journal article supplement (https://www.mdpi.com/2079-6412/8/3/85)
Supplement: s1 [file s1]

# Supplementary Materials

## 1. FT-IR Characterization of Surface-Modified PS Microparticles

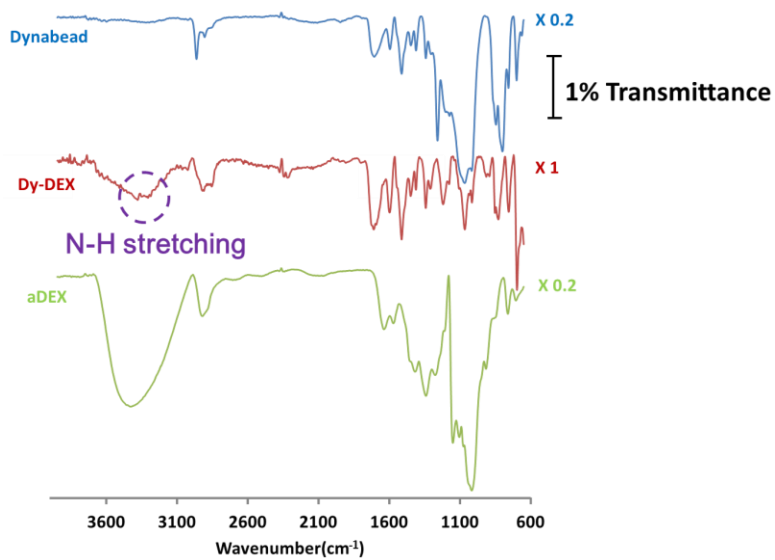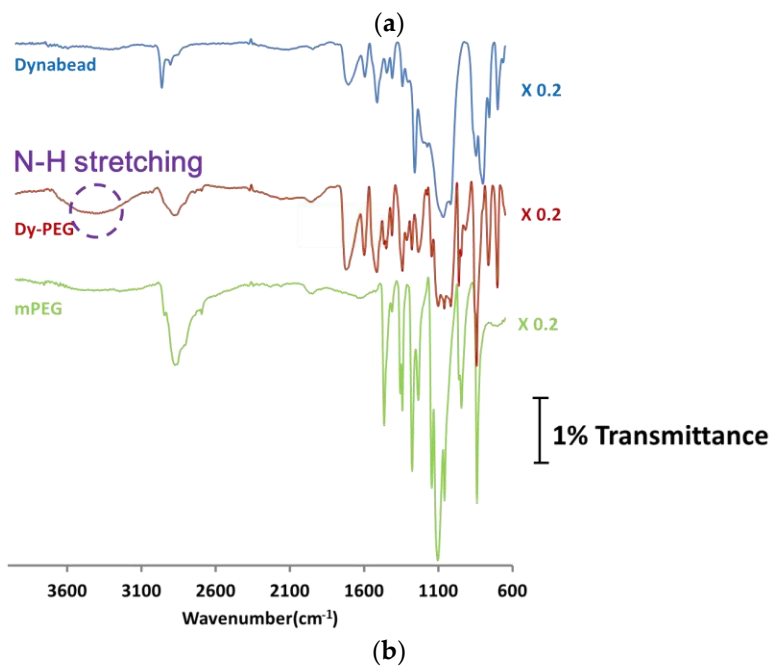

Figure S1. Cont.

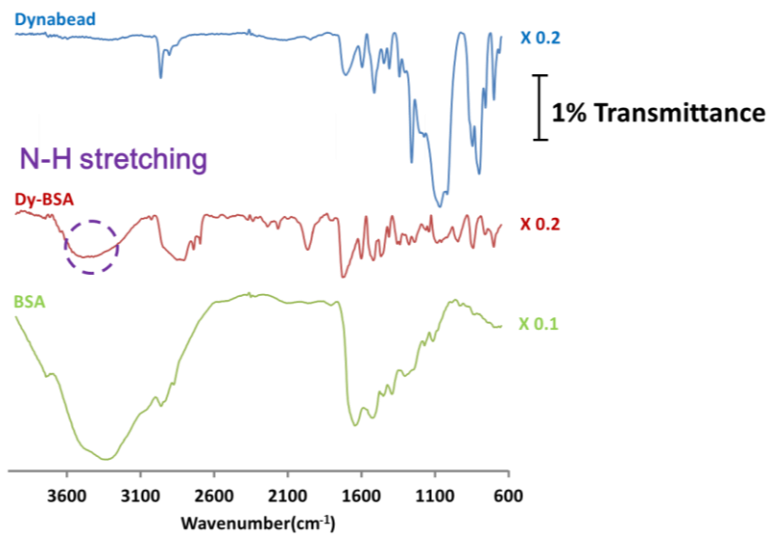

(c)

**Figure S1.** Infrared spectra of (a) PS microparticle (blue), DEX-modified particle (red), and amino-dextran (green); (b) PS microparticle (blue), PEG-modified particle (red), and methoxy-PEG-amine (green); (c) PS microparticle (blue), BSA-modified particle (red), and BSA (green); see reference [5] for peak assignments and conditions.
